# Supplementary material for: Fine Mapping of QUICK ROOTING 1 and 2, Quantitative Trait Loci Increasing Root Length in Rice
Source: PubMed Central journal article supplement (PMC5919730; doi:10.1534/g3.117.300147), 2017-12-26
Supplement: 727FigureS1.pdf [file 727FigureS1.pdf]

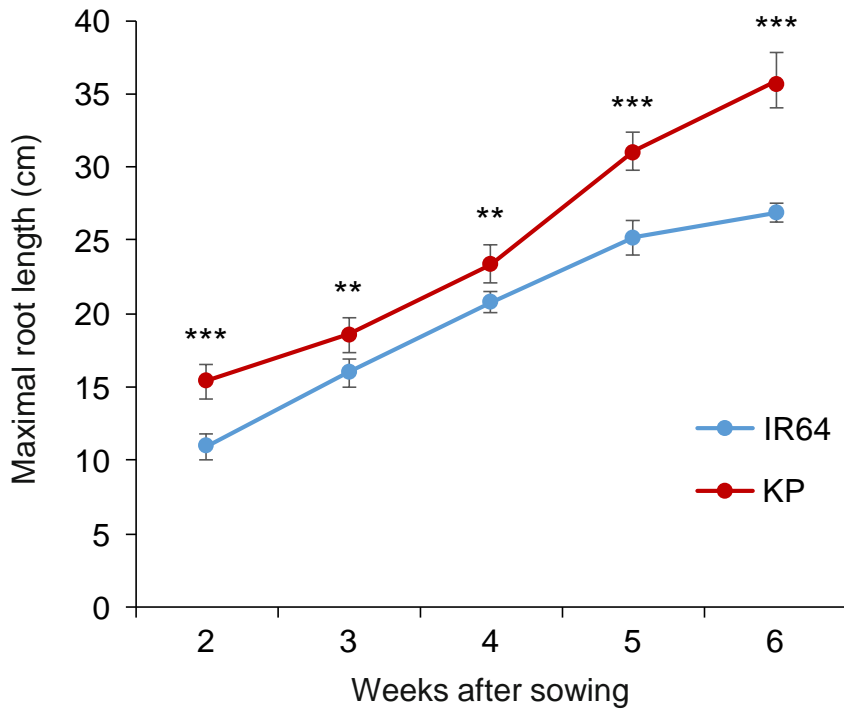

**Figure S1.** Time course of root growth in IR64 and Kinandang Patong (KP) in hydroponic media. Plot shows mean  $\pm$  s.d. ( $n = 5$ ). \*\*Significant at the 1% level; \*\*\*significant at the 0.1% level (Student's *t*-test). Maximal root length was measured as described in Uga et al. (2010).

**Reference:**

Uga, Y., K. Okuno, and M. Yano, 2010 Fine mapping of *Stal1*, a quantitative trait locus determining stele transversal area, on rice chromosome 9. *Mol. Breed.* 26: 533–538.
