# Supplementary material for: Fine Mapping of QUICK ROOTING 1 and 2, Quantitative Trait Loci Increasing Root Length in Rice
Source: PubMed Central journal article supplement (PMC5919730; doi:10.1534/g3.117.300147), 2017-12-26
Supplement: 727FigureS2.pdf [file 727FigureS2.pdf]

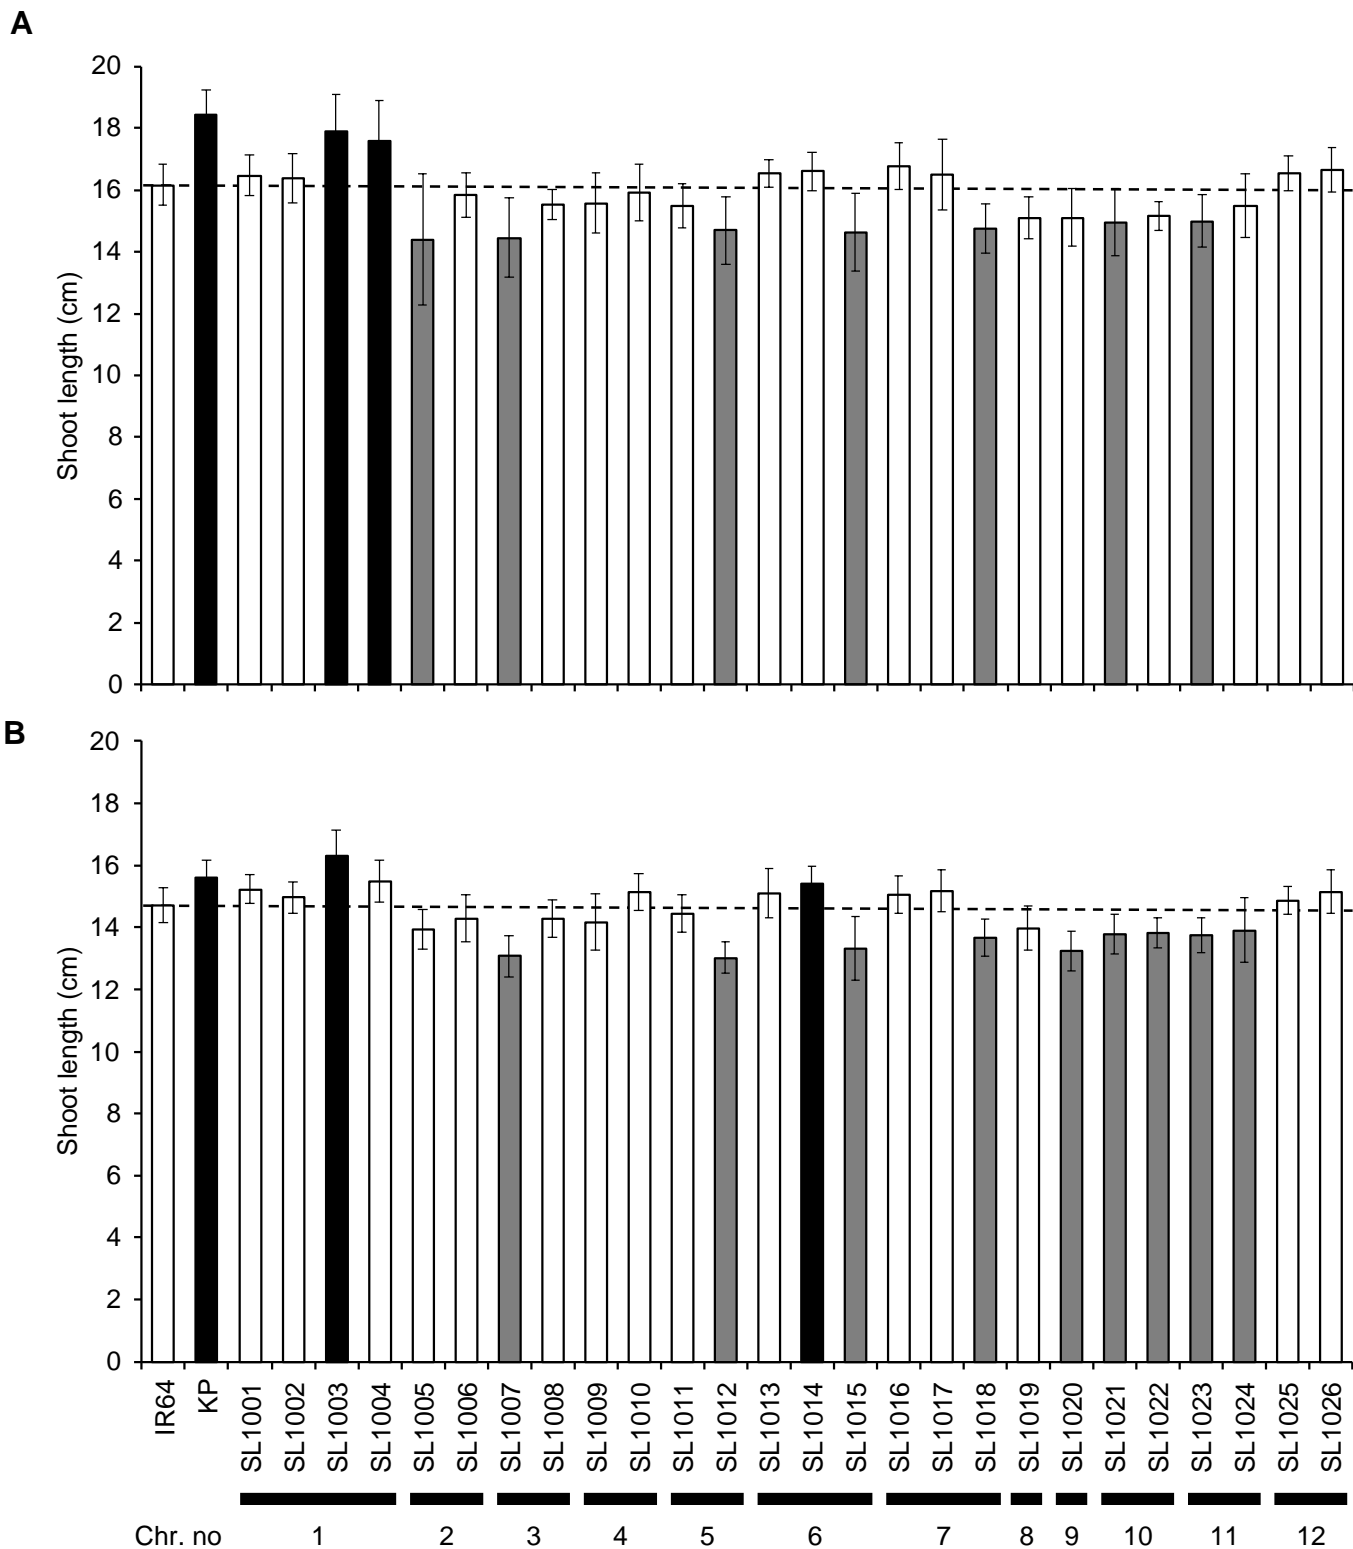

**Figure S2.** Shoot lengths of 26 IK-CSSLs, IR64, and Kinandang Patong (KP) grown in hydroponic conditions. Values are means  $\pm$  SD ( $n = 24$ ). Black and gray bars indicate lines with longer and shorter roots than those of IR64, respectively ( $p < 0.001$ , Dunnett's test). Dashed lines show the mean values of IR64. Substituted chromosome in each line is indicated at the bottom. **(A)** 1st trial (data at 9 days after germination). **(B)** 2nd trial (data at 8 days after germination).
